# Supplementary material for: Heterologous Expression of Dehydration-Inducible MfbHLH145 of Myrothamnus flabellifoli Enhanced Drought and Salt Tolerance in Arabidopsis
Source: Int J Mol Sci. 2022 May 16;23(10):5546. doi: 10.3390/ijms23105546 (PMC9146472; doi:10.3390/ijms23105546)
Supplement: Supplementary file 1 [file ijms-23-05546-s001.zip › ijms-1691014-supplementary.pdf]

|     |                                                                              |     |      |      |     |     |     |
|-----|------------------------------------------------------------------------------|-----|------|------|-----|-----|-----|
|     | 10                                                                           | 20  | 30   | 40   | 50  | 60  | 70  |
| 1   | ATGGGAAAGGACTGTGGATCCTGGTTTCCCCAGCGGCATTATTGTGAGCAATCACCCGATCTGGATAGGTTGTGT  |     |      |      |     |     |     |
| 1   | M G K D C G S W F P Q R H Y C E Q S P D L D R L C                            |     |      |      |     |     |     |
|     | 85                                                                           | 95  | 105  | 115  | 125 | 135 | 145 |
| 76  | CCTCCCCTTCATTGGGACAGCAAAATATGATCCCATCCTACATGAACCCCTTACTCTAATTCGGTTTCTACATAT  |     |      |      |     |     |     |
| 26  | P P L H L G Q Q N M I P S Y M N P Y S N S V S T Y                            |     |      |      |     |     |     |
|     | 160                                                                          | 170 | 180  | 190  | 200 | 210 | 220 |
| 151 | GGGATTTTGCCAATGTTACAATCTCCTGAGTCTCTCCATTTGACGGCAAACCAAGCGGATGAACCTCATGGATGG  |     |      |      |     |     |     |
| 51  | G I L P M L Q S P E S L H L T A N Q A D E P H G W                            |     |      |      |     |     |     |
|     | 235                                                                          | 245 | 255  | 265  | 275 | 285 | 295 |
| 226 | TTTTATTGTTTGGCCCATCGCCAGGCTATTTCCCTGGATCGAAGTCAGTTATCAAAGATGAAGTTCCCTTCT     |     |      |      |     |     |     |
| 76  | F Y C L P H H R Q A I S P G S K S V I K D E V P S                            |     |      |      |     |     |     |
|     | 310                                                                          | 320 | 330  | 340  | 350 | 360 | 370 |
| 301 | AGCCTTTATAAAGCAGATACAGATCAGAGGAGTTCTTAGTTTTTGATCAATCTGGCGATCAAACAACCTTCATG   |     |      |      |     |     |     |
| 101 | S L Y K A D T D Q R R F L V F D Q S G D Q T T F M                            |     |      |      |     |     |     |
|     | 385                                                                          | 395 | 405  | 415  | 425 | 435 | 445 |
| 376 | TTCAGTCCAGCTATTAGGACTTCCATGGAGGGCCTGAGTTCTTTTGGTCCAAGTCCTTATAATGGTCATAACTTT  |     |      |      |     |     |     |
| 126 | F S P A I R T S M E G L S S F G P S P Y N G H N F                            |     |      |      |     |     |     |
|     | 460                                                                          | 470 | 480  | 490  | 500 | 510 | 520 |
| 451 | AGTGGGAAAGGCCAGGTACTGAAAGAGACTCGCTTCACAATGCTGGTCTTATTCTAACAGATGGAAACGAAATT   |     |      |      |     |     |     |
| 151 | S G E R P G T E R D S L H N A G P I L T D G N E I                            |     |      |      |     |     |     |
|     | 535                                                                          | 545 | 555  | 565  | 575 | 585 | 595 |
| 526 | AATGGGACTGATTGGAAAGTGAGATGCATGAAGACACAGAAGAAGTAAATGCCTTGCTGTACTCAGATGACGAG   |     |      |      |     |     |     |
| 176 | N G T D L E S E M H E D T E E L N A L L Y S D D E                            |     |      |      |     |     |     |
|     | 610                                                                          | 620 | 630  | 640  | 650 | 660 | 670 |
| 601 | AATGACTACTCTGAGGATGACGAAGAACTAGCACCGGTCATTTCGCCTAGTACAATGACATCTAACGAAAGATTG  |     |      |      |     |     |     |
| 201 | N D Y S E D D E E T S T G H S P S T M T S N E R L                            |     |      |      |     |     |     |
|     | 685                                                                          | 695 | 705  | 715  | 725 | 735 | 745 |
| 676 | AAAAGCTTTGAAGGAAGTGCTGAAGAAGTTGCTAGCACTGCTGAGCCAAGTAAAAAGCGAAAACCTATCACTCATG |     |      |      |     |     |     |
| 226 | K S F E G S A E E V A S T A E P S K K R K L S L M                            |     |      |      |     |     |     |
|     | 760                                                                          | 770 | 780  | 790  | 800 | 810 | 820 |
| 751 | GACACCGCAACTTCTAGGAAATCAATCCAGTTCTTGGGTTATGAAGAAGATGACGCAGAATCTAGCTGTGGTAAT  |     |      |      |     |     |     |
| 251 | D T A T S R K S I Q F L G Y E E D D A E S S C G N                            |     |      |      |     |     |     |
|     | 835                                                                          | 845 | 855  | 865  | 875 | 885 | 895 |
| 826 | GGCCTTAGTCAAGGTAATGGAGGGGAGGGCAGTAAAAGGCTGAGAAGGGAGAGAATTCGTGCAACTGTGAGCATT  |     |      |      |     |     |     |
| 276 | G L S Q G N G G E G S K R L R R E R I R A T V S I                            |     |      |      |     |     |     |
|     | 910                                                                          | 920 | 930  | 940  | 950 | 960 | 970 |
| 901 | CTACAGAGCATAATTCTTAATGGAATGGGAAAGGATGCAGTTGCGGTTCTTGATGAAGCTATTAACACTTTAGA   |     |      |      |     |     |     |
| 301 | L Q S I I P N G M G K D A V A V L D E A I N Y F R                            |     |      |      |     |     |     |
|     | 985                                                                          | 995 | 1005 | 1015 |     |     |     |
| 976 | TCTTTGAAGCTCAAAGCCAAAGCTTTAGGACTTGATTCTCTCTAA                                |     |      |      |     |     |     |
| 326 | S L K L K A K A L G L D S L *                                                |     |      |      |     |     |     |

**Figure S1.** Nucleotide and deduced amino acid sequence of MfbHLH145.
